# Supplementary material for: Interlayer confinement synthesis of Ir nanodots/dual carbon as an electrocatalyst for overall water splitting
Source: Royal Society of Chemistry journal article supplement (doi:10.1039/d0ta09358k), 2020-12-10
Supplement: d0ta09358k1.pdf [file d0ta09358k1.pdf]

## Electronic Supplementary Material (ESI) for Journal of Materials Chemistry A

### Interlayer confinement synthesis of Ir nanodots/dual carbon as an electrocatalyst for overall water splitting†

Yaru Li, Yu-Quan Zhu, Weili Xin, Song Hong, Xiaoying Zhao, Hong Yan\* and Sailong Xu\*

*State Key Laboratory of Chemical Resource Engineering, Beijing University of  
Chemical Technology, Beijing 100029, China*

\*Corresponding authors. E-mails: xusl@mail.buct.edu.cn (S.X.);  
yanhong@mail.buct.edu.cn (H.Y.)

Figure S1

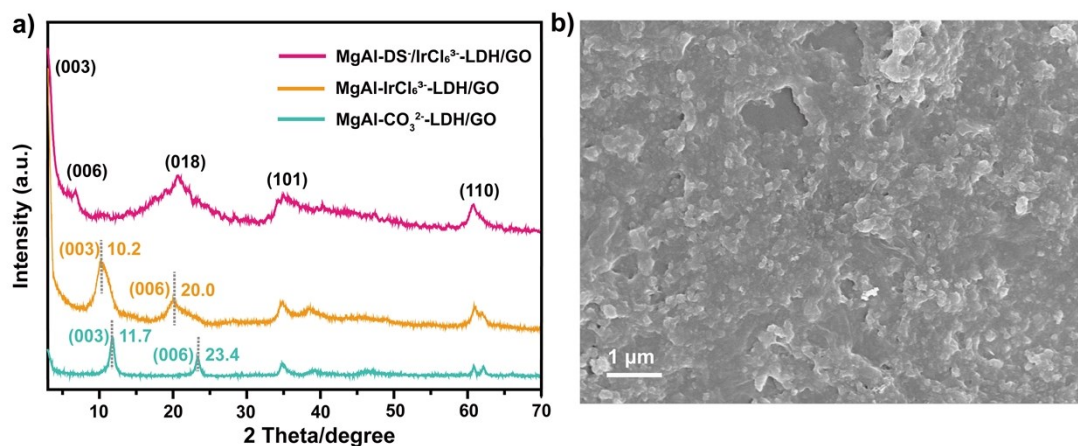

**Fig. S1** (a) Comparison of XRD patterns between the MgAl-DS-/IrCl<sub>6</sub><sup>3-</sup>-LDH/GO precursor, MgAl-IrCl<sub>6</sub><sup>3-</sup>-LDH/GO, and MgAl-CO<sub>3</sub><sup>2-</sup>-LDH/GO; (b) SEM images of the MgAl-DS-/IrCl<sub>6</sub><sup>3-</sup>-LDH/GO precursor.

**Figure S2**

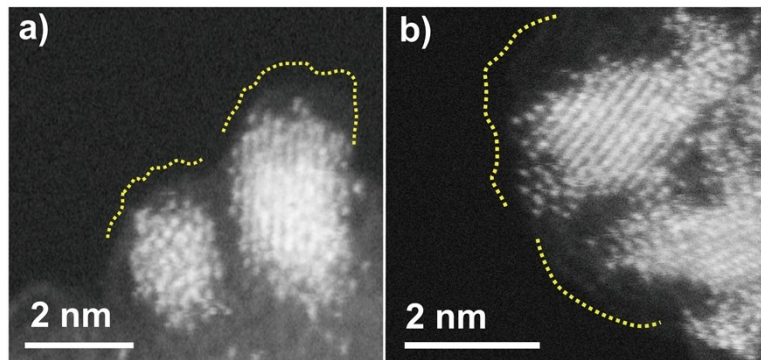

**Fig. S2** High-resolution HADDF STEM of Ir@S-C/rGO before test.

Figure S3

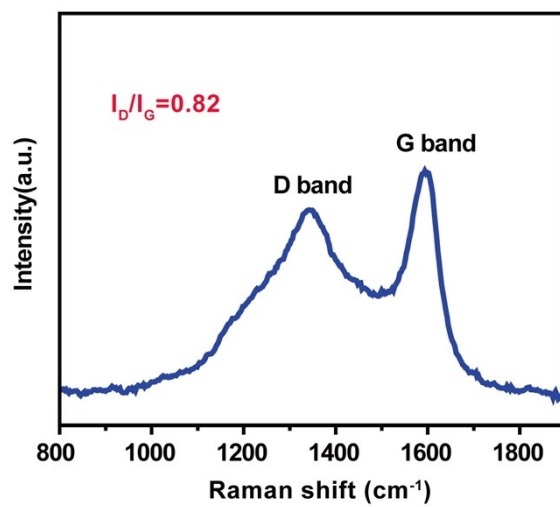

Fig. S3 Raman spectrum of the Ir@S-C/rGO composite before test.

Figure S4

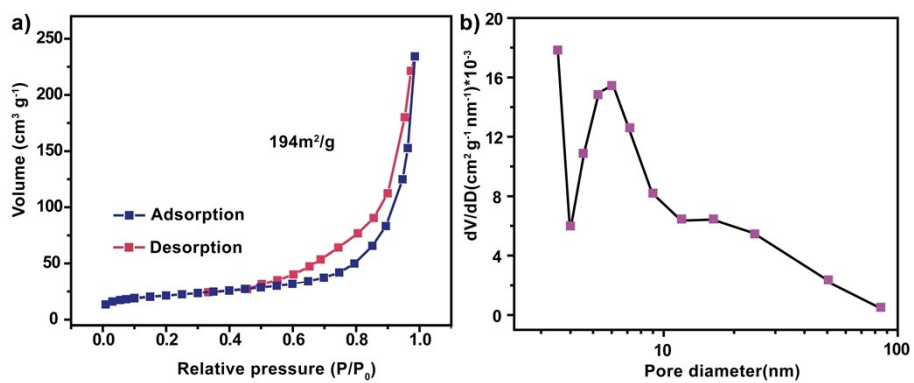

**Fig. S4** (a)  $N_2$  adsorption/desorption isotherms and (b) the pore size distribution of the Ir@S-C/rGO composite before test.

**Figure S5**

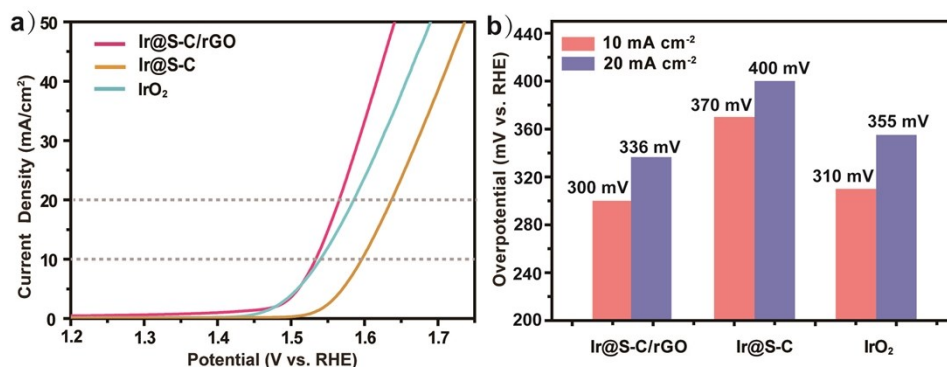

**Fig. S5** Electrocatalytic performance for the OER. (a) LSV curves without iR correction, (b) the overpotentials at 10 mA cm<sup>-2</sup> and 20 mA cm<sup>-2</sup> that were obtained without iR correction.

In the case of no iR correction for the OER, Fig. S5 shows that the Ir@S-C/rGO electrocatalyst requires an overpotential of 300 mV at a current density of 10 mA cm<sup>-2</sup>. The overpotential is much lower than those of the commercial IrO<sub>2</sub> (310 mV) and Ir@S-C (370 mV). At a current density of 20 mA cm<sup>-2</sup>, the Ir@S-C/rGO catalyst requires 336 mV, which is lower than those of commercial IrO<sub>2</sub> (355 mV) and Ir@S-C (400 mV) at the same current density.

Figure S6

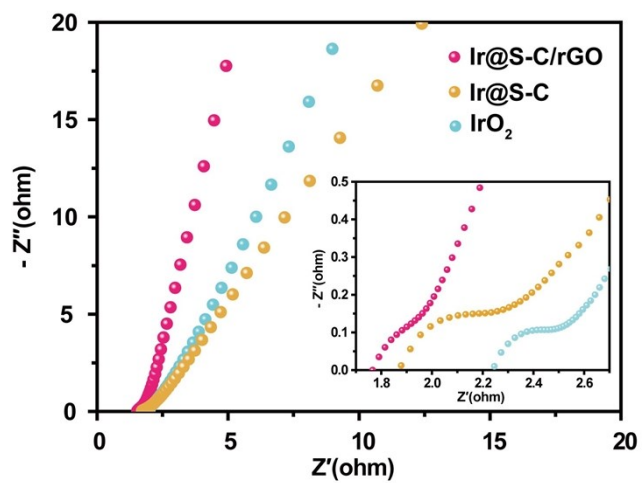

Fig. S6 Electrochemical impedance spectra of Ir@S-C/rGO, Ir@S-C, and IrO<sub>2</sub> for the OER.

Figure S7

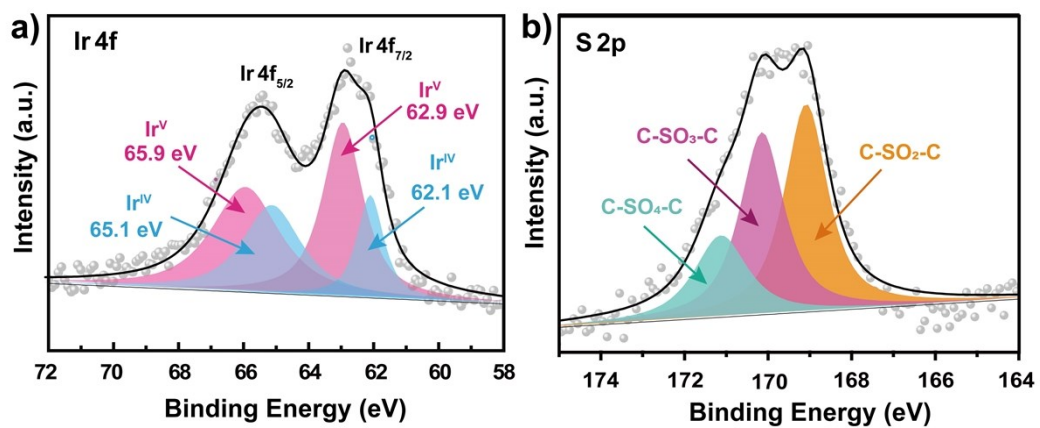

**Fig. S7** XPS spectra of the Ir@S-C/rGO composite after the OER testing: (a) Ir 4f and (b) S 2p.

Figure S8

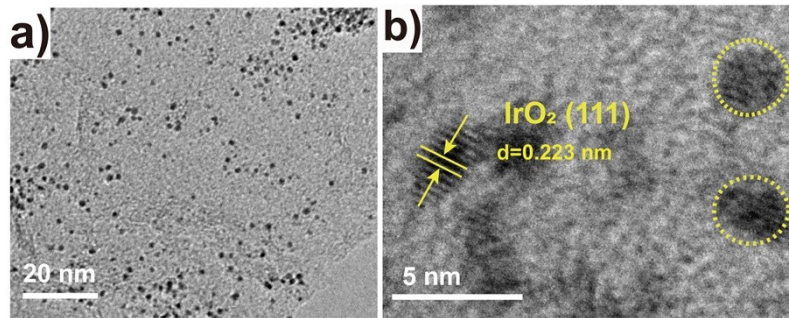

**Fig. S8** (a) TEM and (b) HRTEM images of the Ir@S-C/rGO composite after the OER testing.



Figure S9

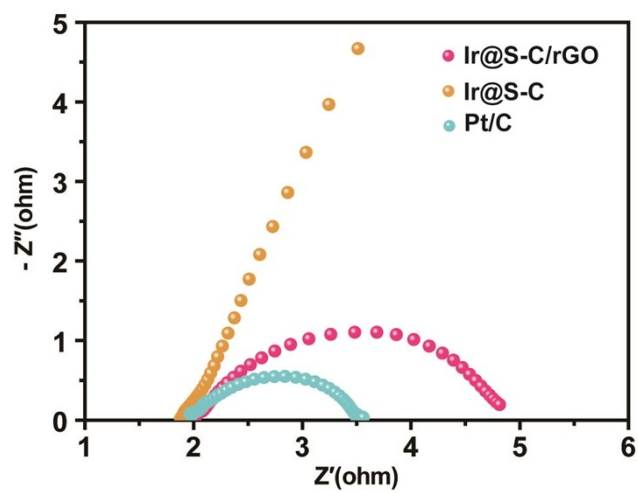

Fig. S9 Electrochemical impedance spectra of Ir@S-C/rGO, Ir@S-C, and Pt/C for the HER.

Figure S10

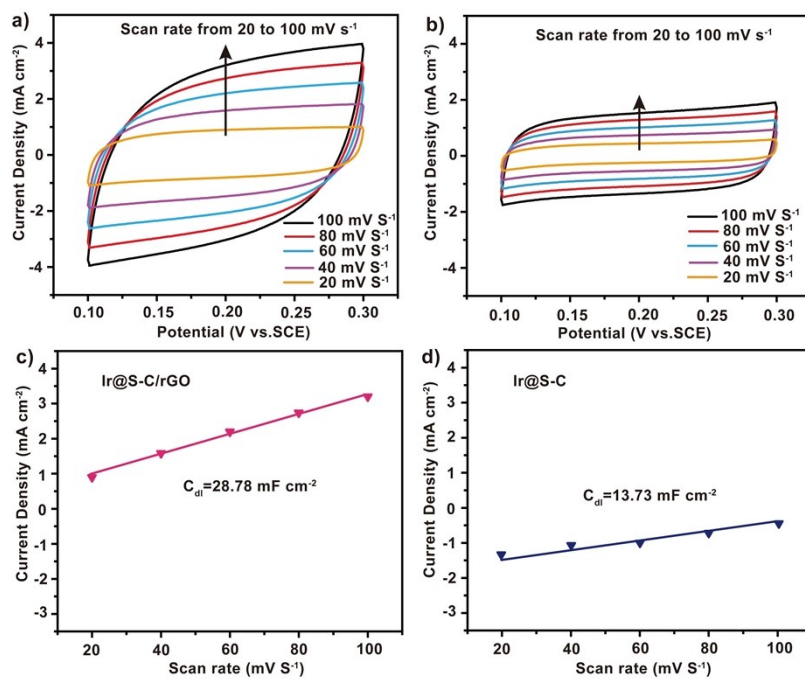

**Fig. S10** (a, b) Cyclic voltammograms (CVs) and (c, d) the current densities at 0.2 V vs SCE at the scan rates from 20 to 100 mV/s: (a, c) Ir@S-C/rGO, (b, d) Ir@S-C.

Figure S11

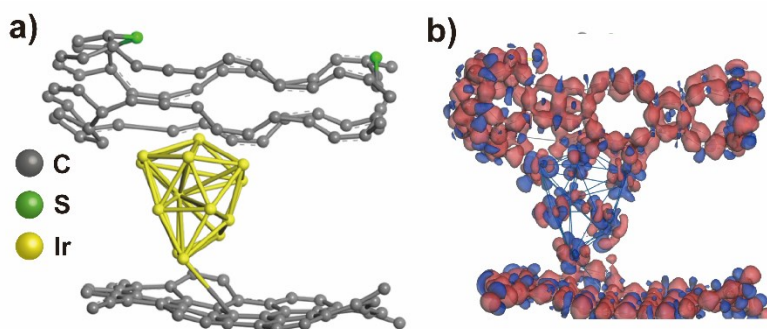

**Fig. S11** (a) The optimized structure of Ir@S-C/rGO from the side views of  $xz$  plane; (b) The electronic density difference of Ir@S-C/rGO from the side views of  $xz$  plane. The red region presented the electrons accumulation, and the blue region indicated the positive charges (isovalue =  $0.1 e \text{ \AA}^{-3}$ )

The simulation model of Ir@S-C/rGO was consisted of reduced graphene oxide (rGO), Ir<sub>13</sub> cluster and sulfur-doped amorphous carbon (S-C) (as shown in Fig. S11a). The structural parameters were derived from the experimental data.<sup>1,2</sup> The model of the graphene without hydroxyl groups or functional groups containing oxygen atoms were built as the substrate. And the model of S-C was constructed by replacing two carbon atoms with two sulfur atoms. The optimized structures were presented (as shown in Fig. S11a). In addition, the electronic density difference was calculated to illustrate the charge redistribution after bonding (Fig. S11b).

#### References:

1. M. Guo, Y. Liu, S. Dong, X. Jiao, T. Wang and D. Chen, *ChemSusChem*, 2018, **11**, 4150-4155.
2. X. Zhu, X. Zhang, B. Huang, J. Li and E. Wang, *J. Mater. Chem. A*, 2019, **7**, 18304-18310.

**Table S1**

Comparison of OER performance at 10 mA cm<sup>-2</sup> between the Ir@S-C/rGO composite and the Ir based electrocatalysts reported previously (in 1.0 M KOH solution).

| Catalysts                | Ir content (wt%) | Overpotential (mV) | Tafel (mv dec <sup>-1</sup> ) | References                                                       |
|--------------------------|------------------|--------------------|-------------------------------|------------------------------------------------------------------|
| Ir@Co/NC                 | 2.2              | 260                | 163                           | <i>Angew. Chem. Int. Ed.</i> 2019, <b>58</b> , 11868             |
| Ir@N-G                   | 3.2              | 270                | 60                            | <i>Nano Energy</i> 2019, <b>62</b> , 117                         |
| Ir@G                     | 5.8              | 329                | 90                            |                                                                  |
| NiIr/rGO                 | 4.9              | 272                | 56                            | <i>J. Energy Chem.</i> 2020, <b>49</b> , 166                     |
| IrOOH/Ir                 | 7.2              | 266                | 29                            | <i>Natl. Sci. Rev.</i> 2020, in press (DOI: 10.1093/nsr/nwaa058) |
| Co@Ir/NC                 | 7.5              | 280                | 74                            | <i>ACS Sustain. Chem. Eng.</i> 2018, <b>6</b> , 5105             |
| IrO <sub>2</sub>         | 56.0             | 349                | 79                            |                                                                  |
| Ir/MoS <sub>2</sub>      | 9.8              | 330                | 44                            | <i>ACS Energy Lett.</i> 2018, <b>4</b> , 368                     |
| Ir <sub>18wt%</sub> /NiO | 18.0             | 215                | 38                            | <i>J. Am. Chem. Soc.</i> 2020, <b>16</b> , 7425–7433             |
| Ir/C                     | 20.0             | 284                | 87                            |                                                                  |
| NiVIr-LDH                | 26.4             | 203                | 54                            | <i>ACS Energy Lett.</i> 2019, <b>4</b> , 1823                    |
| Ir/CN                    | -                | 265                | 35                            | <i>ACS Appl. Mater. Interfaces</i> 2018, <b>10</b> , 22340       |
| Ir/vertical GO           | -                | 320                | 52                            | <i>J. Mater. Chem. A.</i> 2019, <b>7</b> , 20590.                |
| Ir@S-C/rGO               | 6.2              | 280                | 54                            | <b>This work</b>                                                 |

**Table S2**

Comparison of HER performance at 10 mA cm<sup>-2</sup> between the Ir@S-C/rGO composite and the Ir based electrocatalysts reported previously (in 1.0 M KOH solution).

| Catalysts           | Ir content (wt%) | Overpotentia l (mV) | Tafel (mv dec <sup>-1</sup> ) | References                                                       |
|---------------------|------------------|---------------------|-------------------------------|------------------------------------------------------------------|
| Ir@Co/NC            | 2.2              | 55                  | 119                           | <i>Angew. Chem. Int. Ed. Eng.</i> 2019, <b>58</b> , 11868        |
| Ir@N-G              | 3.2              | 43                  | 35                            | <i>Nano Energy</i> , 2019, <b>62</b> , 117                       |
| Ir@G                | 5.8              | 150                 | 85                            |                                                                  |
| NiIr/rGO            | 4.9              | 33                  | 64                            | <i>J. Energy Chem.</i> , 2020, <b>49</b> , 166.                  |
| IrOOH/Ir            | 7.2              | 50                  | 29                            | <i>Natl. Sci. Rev.</i> 2020, in press (DOI: 10.1093/nsr/nwaa058) |
| Co@Ir/NC            | 7.5              | 121                 | 98                            | <i>ACS Sustainable Chem. Eng.</i> 2018, <b>6</b> , 5105          |
| Ir/MoS <sub>2</sub> | 9.8              | 44                  | 32                            | <i>ACS Energy Lett.</i> 2018, <b>4</b> , 368                     |
| Ir@3DCON            | 20.5             | 13.5                | 29                            | <i>Adv. Mater.</i> 2018, <b>30</b> , e1805606                    |
| Ir NP/C             | 23.0             | 29                  | 42                            | <i>Adv. Energy Mater.</i> 2018, <b>8</b> , 1801698               |
| Ir/C                | 20.0             | 28                  | 32                            | <i>ACS Energy Lett.</i> 2019, <b>4</b> , 1823                    |
| NiVIr-LDH           | 26.4             | 41                  | 36                            |                                                                  |
| Ir/CN               | -                | 12                  | 28                            | <i>ACS Appl. Mater. Interfaces</i> 2018, <b>10</b> , 22340       |
| Ir/vertical GO      | -                | 17                  | 29                            | <i>J. Mater. Chem. A</i> 2019, <b>7</b> , 20590                  |
| Ir@S-C/rGO          | 6.2              | 20                  | 21                            | <b>This work</b>                                                 |

**Table S3**

Comparison of overall-water-splitting performance at 10 mA cm<sup>-2</sup> between the Ir@S-C/rGO composite and the Ir based electrocatalysts reported previously (in 1.0 M KOH solution).

| Catalysts           | Ir content (wt%) | Overall voltage (V) | Durability (h) | References                                                       |
|---------------------|------------------|---------------------|----------------|------------------------------------------------------------------|
| Ir@Co/NC            | 2.2              | 1.60                | 5              | <i>Angew. Chem. Int. Ed.</i> 2019, <b>58</b> , 11868.            |
| NiIr/rGO            | 4.9              | 1.55                | 24             | <i>J. Energy Chem.</i> 2020, <b>49</b> , 166.                    |
| Ir/CN               | -                | 1.51                | 2              | <i>ACS Appl. Mater. Interfaces</i> 2018, <b>10</b> , 22340.      |
| Ir@N-G              | 3.2              | 1.51                | 40             | <i>Nano Energy</i> 2019, <b>62</b> , 117.                        |
| Ir@G                | 5.8              | 1.59                | 40             | <i>Natl. Sci. Rev.</i> 2020, in press (DOI: 10.1093/nsr/nwaa058) |
| IrOOH/Ir            | 7.2              | 1.58                | 10             | <i>ACS Sustain. Chem. Eng.</i> 2018, <b>6</b> , 5105.            |
| Co@Ir/NC            | 7.5              | 1.51                | 12             | <i>ACS Energy Lett.</i> 2018, <b>4</b> , 368.                    |
| Ir/MoS <sub>2</sub> | 9.8              | 1.57                | 12             | <i>ACS Energy Lett.</i> 2019, <b>4</b> , 1823.                   |
| NiVIr-LDH           | 26.4             | 1.49                | 15             | <i>J. Mater. Chem. A</i> 2019, <b>7</b> , 20590.                 |
| Ir/C-Pt/C           | 20.0             | 1.60                | 16             |                                                                  |
| Ir/vertical GO      | -                | 1.57                | 24             |                                                                  |
| Ir@S-C/rGO          | 6.2              | 1.51                | 24             | <b>This work</b>                                                 |
